# Supplementary material
Source: PubMed Central journal article supplement (PMC1200264)

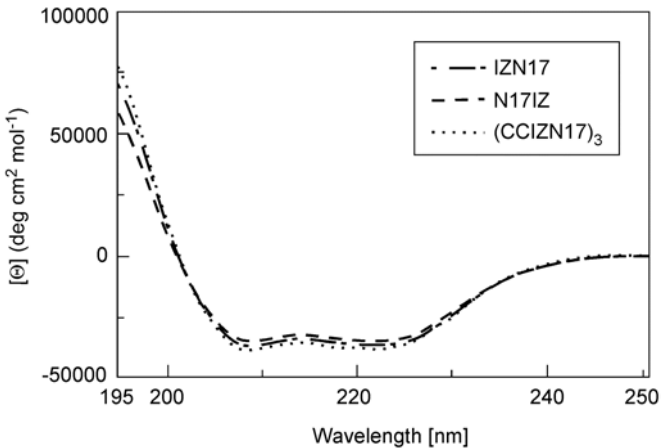

Supplement: pnas_0502449102_1.pdf [file pnas_0502449102_1.pdf]

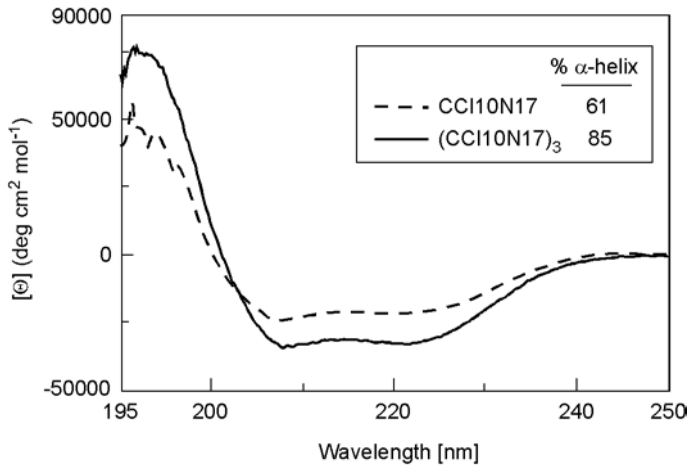

Supplement: pnas_0502449102_2.pdf [file pnas_0502449102_2.pdf]
